# Supplementary material for: Morganella Phage Mecenats66 Utilizes an Evolutionarily Distinct Subtype of Headful Genome Packaging with a Preferred Packaging Initiation Site
Source: MDPI journal article supplement (doi:10.3390/microorganisms10091799), 2022-09-07
Supplement: s1 [file s1]

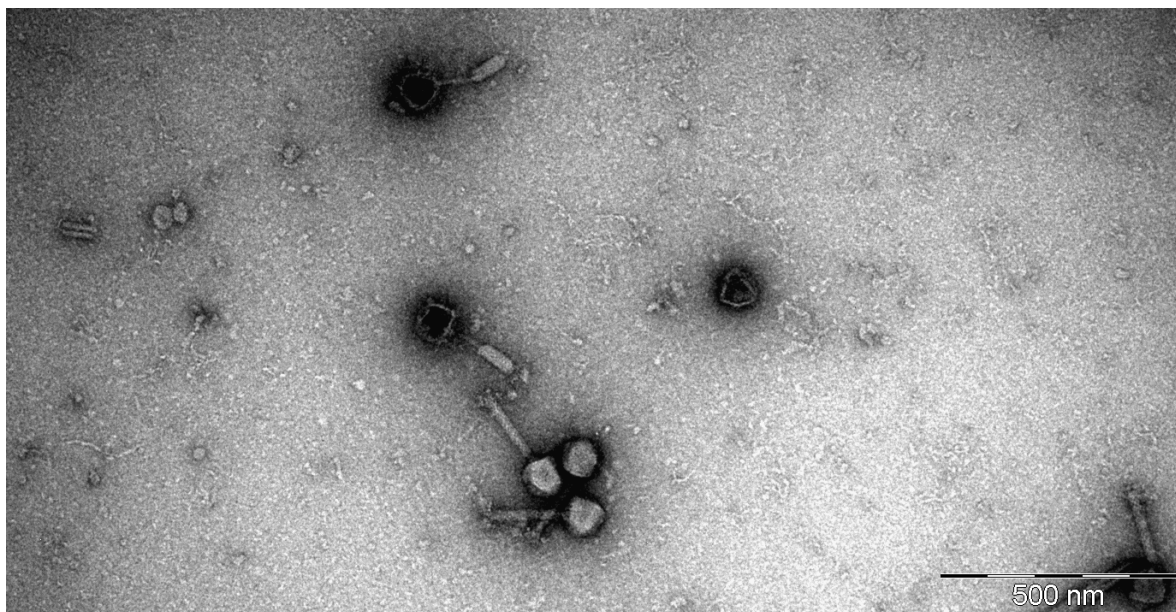

Figure S1: Transmission electron micrograph demonstrating a characteristic field of view for a non-purified phage lysate containing *Morganella* bacteriophage Mecenats66 virions ( $\sim 10^{10}$  PFU/mL) negatively stained with 0.5% uranyl acetate. Both intact and defective virions or parts of thereof are visible.

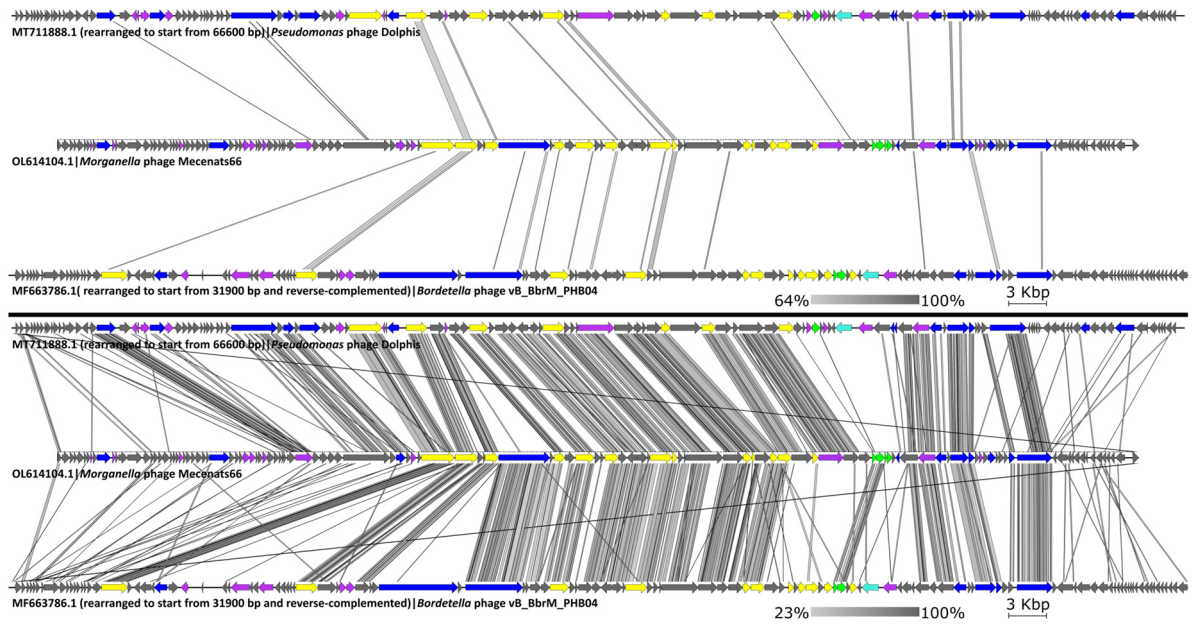

Figure S2: Pairwise genome nucleotide sequence and genome organization comparison of *Morganella* phage Mecenats66 (middle) to *Pseudomonas* phage Dolphis (upper), and to *Bordetella* phage vB\_BbrM\_PHB04 (lower) using BLASTN (upper tile) and TBLASTX (lower tile). Genomes are drawn to scale, genomes of Dolphis and PHB04 were reordered as indicated to ensure collinearity with Mecenats66; the scale bar indicates 3000 base pairs. Arrows representing the open reading frames point in the direction of transcription and are color-coded based on the function of their putative product: yellow—phage particle morphogenesis, green—lysis, blue—DNA replication, modification, and repair, cyan—lysogeny, purple—additional functions, gray—hypothetical protein of unknown function. Gray boxes represent regions of similarity between the genomes and are colored in a gradient according to their identity; darker shades of gray represent a higher identity. The pairwise comparisons were carried out using EasyFig (v.2.2.2.; [67]).

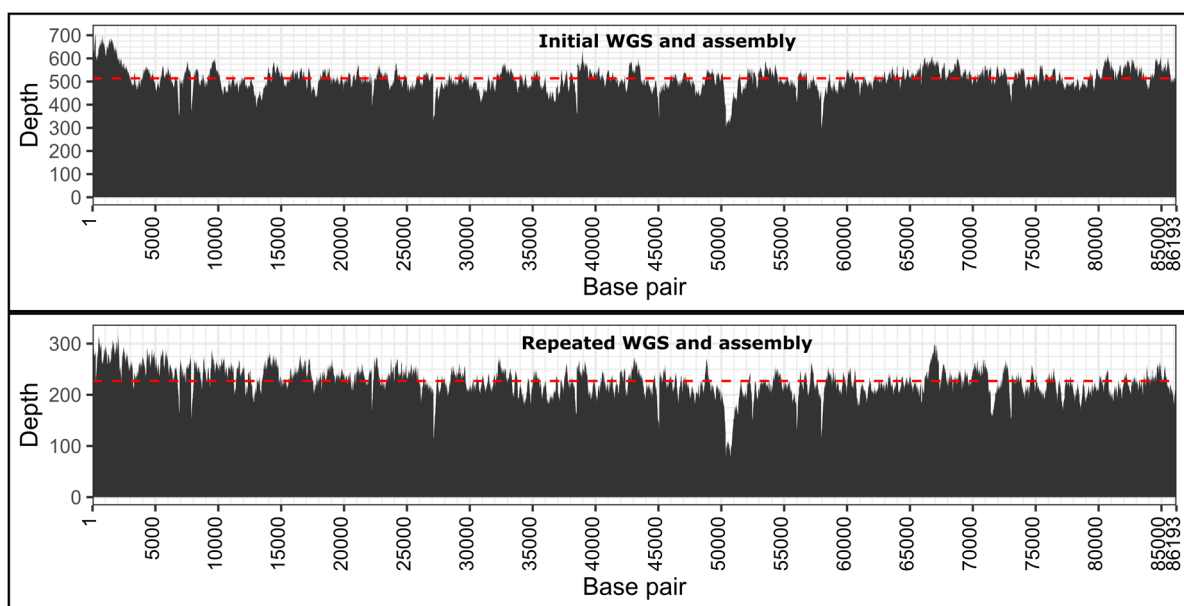

Figure S3: Whole genome base depth histograms of the initial (upper tile) and repeated (lower tile) whole genome sequencing of the *Morganella* bacteriophage Mecenats66 genomic DNA. Corresponding experimental reads were mapped onto the correctly reorganized de novo assembled genome of Mecenats66. Red dashed horizontal lines indicate the mean coverages.
