# Supplementary material for: Morganella Phage Mecenats66 Utilizes an Evolutionarily Distinct Subtype of Headful Genome Packaging with a Preferred Packaging Initiation Site
Source: Microorganisms. 2022 Sep 7;10(9):1799. doi: 10.3390/microorganisms10091799 (PMC9503643; doi:10.3390/microorganisms10091799)
Supplement: Supplementary file 1 [file microorganisms-10-01799-s001.zip]

Archive with 4 entries (4 files):
- microorganisms-1865726-supplementary.pdf
- SupplementaryTableS1.xlsx
- SupplementaryTableS2.xlsx
- SupplementaryTableS3.xlsx
