# Supplementary material for: Morganella Phage Mecenats66 Utilizes an Evolutionarily Distinct Subtype of Headful Genome Packaging with a Preferred Packaging Initiation Site
Source: Microorganisms. 2022 Sep 7;10(9):1799. doi: 10.3390/microorganisms10091799 (PMC9503643; doi:10.3390/microorganisms10091799)
Supplement: Supplementary file 1 [file microorganisms-10-01799-s001.zip › SupplementaryTableS1.xlsx]

## Sheet: Mecenats66_fromGBandFreeAlign
Genome	ORF	Strand	Start position	End position	Product size (aa)	Shine-Dalgarno sequece				Start codon	Product	Product accession	Comment
						20 bp upstream of start codon	putative SD sequences (G-U wobble base pairs allowed)	DeltaG (kcal/mol; as calculated by free_align.pl -o "20bp" AUUCCUCCACUAG)	Spacer length (number bases between last base of the putative SD sequence and start codon)
OL614104.1	#123	+	85704	14	167	CGCAGCAGGAGGATCCAACC	AGGAGG	-8.93096	8	ATG	hypothetical protein	UIS74683.1	Compound direct strand CDS
OL614104.1	#1	+	35	331	98	TGATACAGGGGCCAGTCTGC	AGGGG	-4.90869	9	ATG	hypothetical protein	UIS74561.1	Direct strand CDS
OL614104.1	#2	+	388	1005	205	TCGTCTGGGGAGACAAAAAA	TGGGGAG	-7.23473	8	ATG	hypothetical protein	UIS74562.1	Direct strand CDS
OL614104.1	#3	+	1008	1343	111	TTAATGTATGAGGATTAATT	TGAGGA	-5.87344	6	ATG	hypothetical protein	UIS74563.1	Direct strand CDS
OL614104.1	#4	+	1330	1575	81	CGGCCTGGGAGTCATGAATA	GGGAG	-5.7311	9	ATG	hypothetical protein	UIS74564.1	Direct strand CDS
OL614104.1	#5	+	1589	2152	187	ATTTTAACGGGGTTATAATA	GGGGT	-5.08433	7	ATG	hypothetical protein	UIS74565.1	Direct strand CDS
OL614104.1	#6	+	2142	2369	75	CTGCTTTATGGCGGTAAACG	GGT	-1.42345	5	ATG	hypothetical protein	UIS74566.1	Direct strand CDS
OL614104.1	#7	+	2359	2643	94	CCTTGGGGAGATCATTTTTG	TGGGGAG	-7.23473	10	ATG	hypothetical protein	UIS74567.1	Direct strand CDS
OL614104.1	#8	+	2647	2808	53	TGTTAATTGTGGAGTAAAAA	GGAG	-3.60793	6	ATG	protein of unknown function DUF5419	UIS74568.1	Direct strand CDS
OL614104.1	#9	+	2848	3153	101	ATTGCCCGACACCAGGGGAA	AGGGG	-4.90869	2	ATG	hypothetical protein	UIS74569.1	Direct strand CDS
OL614104.1	#10	+	3160	4257	365	TAATCATTAAGTGAGGATTT	TGAGGA	-5.87344	3	ATG	recombination-associated protein	UIS74570.1	Direct strand CDS
OL614104.1	#11	+	4392	4637	81	TTTCACTATCTGGGGATATC	TGGGGA	-5.1598	4	ATG	protein of unknown function DUF905	UIS74571.1	Direct strand CDS
OL614104.1	#12	+	4647	4838	63	GCTGGATTTAAGGGGGAATC	TAAGGGGG	-10.4159	4	GTG	hypothetical protein	UIS74572.1	Direct strand CDS
OL614104.1	#13	+	4883	5590	235	CTGTCTAATCTGGGGGCATC	GGGGG	-6.08185	4	GTG	hypothetical protein	UIS74573.1	Direct strand CDS
OL614104.1	#14	+	5603	6778	391	AAATGTAAAGTGAGGTTTTT	GAGGT	-5.85851	4	ATG	hypothetical protein	UIS74574.1	Direct strand CDS
OL614104.1	#15	+	6881	7441	186	CACAACTAAACGGGGGATTT	GGGGG	-6.08185	4	ATG	hypothetical protein	UIS74575.1	Direct strand CDS
OL614104.1	#16	+	7441	7701	86	GAACTGGCGGAACCGTGGTA	GTGGT	-3.17643	1	ATG	hypothetical protein	UIS74576.1	Direct strand CDS
OL614104.1	#17	+	7676	8068	130	AATATGGGAGATCTGGAACC	GGGAG	-5.7311	10	ATG	hypothetical protein	UIS74577.1	Direct strand CDS
OL614104.1	#18	+	8055	8417	120	GAAATTGGAGTATGTAGGCA	GGAG	-3.60793	10	ATG	hypothetical protein	UIS74578.1	Direct strand CDS
OL614104.1	#19	+	8407	8988	193	CACAATAACCGAGGCGAAAC	GAGG	-3.60793	6	ATG	hypothetical protein	UIS74579.1	Direct strand CDS
OL614104.1	#20	+	8992	9225	77	AACTTTATCCGGGATAAATT	GGGA	-3.65617	6	ATG	hypothetical protein	UIS74580.1	Direct strand CDS
OL614104.1	#21	+	9222	9449	75	TCTAATAAAAGGGGTCAGCC	AAGGGG	-5.83584	6	ATG	hypothetical protein	UIS74581.1	Direct strand CDS
OL614104.1	#22	+	9456	9743	95	ACCGGAGACAATAAAACGTC	GGAG	-3.60793	13	TTG	hypothetical protein	UIS74582.1	Direct strand CDS
OL614104.1	#23	+	9713	10021	102	CGTATCGGGAAATTCAGACT	GGGA	-3.65617	10	ATG	putative regulatory protein N	UIS74583.1	Direct strand CDS
OL614104.1	#24	+	10032	10280	82	AACGAAATAAGGGGAGATTT	TAAGGGG	-7.16777	6	ATG	hypothetical protein	UIS74584.1	Direct strand CDS
OL614104.1	#25	+	10283	10693	136	AAAGCTGGGGAGAAATAACC	TGGGGAG	-7.23473	8	ATG	hypothetical protein	UIS74585.1	Direct strand CDS
OL614104.1	#26	+	10686	11009	107	ATTTTCCAATGGGTTTGGTC	GGGT	-3.54662	6	ATG	hypothetical protein	UIS74586.1	Direct strand CDS
OL614104.1	#27	+	11023	11583	186	GAAATAAATCTGGGGGGGTT	TGGGGGGGT	-11.9592	1	ATG	hypothetical protein	UIS74587.1	Direct strand CDS
OL614104.1	#28	+	11564	11884	106	TGCCGGGGTTCCGGGAGAAA	GGGAG	-5.7311	3	ATG	hypothetical protein	UIS74588.1	Direct strand CDS
OL614104.1	#29	+	11893	12132	79	ATAGTTTTGTGAGGTGATTA	GAGGTGATT	-12.676	1	ATG	hypothetical protein	UIS74589.1	Direct strand CDS
OL614104.1	#30	+	12125	13711	528	TTTTAAAGCGGTGAACACTG	GGTGA	-5.88054	6	ATG	cytosine-specific DNA methyltransferase	UIS74590.1	Direct strand CDS
OL614104.1	#31	+	13723	14118	131	CTTGAATAACGGGGTTTATC	GGGGT	-5.08433	5	ATG	hypothetical protein	UIS74591.1	Direct strand CDS
OL614104.1	#32	+	14182	14514	110	ATCGAAACAAGGGGGGATTC	AAGGGGG	-9.08394	5	ATG	hypothetical protein	UIS74592.1	Direct strand CDS
OL614104.1	#33	+	14507	14791	94	TTATAAAACAGGTGATGAAA	AGGTGAT	-9.05447	4	ATG	hypothetical protein	UIS74593.1	Direct strand CDS
OL614104.1	#34	+	14788	15351	187	CGTGACAATGGCGGTAAAAA	GTGA	-2.63244	15	ATG	protein of unknown function DUF2591	UIS74594.1	Direct strand CDS
OL614104.1	#35	+	15335	15820	161	CCTGAAATTAAGTGATCGCT	GTGATC	-6.09156	3	ATG	putative methyltransferase	UIS74595.1	Direct strand CDS
OL614104.1	#36	+	15817	16020	67	GTTTTTTTTAAGGGGGAGCG	TAAGGGGG	-10.4159	4	GTG	hypothetical protein	UIS74596.1	Direct strand CDS
OL614104.1	#37	+	16023	16388	121	CATAAAATAGAGGAATAATT	GAGGA	-4.86934	6	ATG	hypothetical protein	UIS74597.1	Direct strand CDS
OL614104.1	#38	+	16378	16740	120	TATCGAATGGAGCGAAACCG	GGAG	-3.60793	8	ATG	protein of unknown function DUF2591	UIS74598.1	Direct strand CDS
OL614104.1	#39	+	16737	17294	185	GACGAAAAGGAAAATAAACA	AAGGA	-4.53508	9	ATG	hypothetical protein	UIS74599.1	Direct strand CDS
OL614104.1	#40	+	17281	17673	130	AGTAAGTGATGGTGGTGAGC	GGTGGT	-6.42453	4	ATG	hypothetical protein	UIS74600.1	Direct strand CDS
OL614104.1	#41	+	17673	17900	75	AGCGGTAAAAAGGGGGCATG	AAGGGGG	-9.08394	4	ATG	hypothetical protein	UIS74601.1	Direct strand CDS
OL614104.1	#42	+	17897	18025	42	GAAATTCAGGATGAACTATC	AGGA	-3.60793	9	ATG	hypothetical protein	UIS74602.1	Direct strand CDS
OL614104.1	#43	+	18026	18253	75	GGATGTTCGGAGTGAAATAA	GGAG	-3.60793	8	ATG	hypothetical protein	UIS74603.1	Direct strand CDS
OL614104.1	#44	+	18319	18978	219	AATTCAGCCTGGGGGTGTTT	GGGGGTG	-10.4294	3	ATG	hypothetical protein	UIS74604.1	Direct strand CDS
OL614104.1	#45	+	18975	20351	458	TACAGCGTAGAGGATGAATC	GAGGA	-4.86934	6	ATG	ParB N-terminal-like domain-containing methyltransferase	UIS74605.1	Direct strand CDS
OL614104.1	#46	+	20353	20901	182	ACCTGAAAAGGATAAGTGAC	AAGGA	-4.53508	8	ATG	hypothetical protein	UIS74606.1	Direct strand CDS
OL614104.1	#47	+	20912	21586	224	AACAGAGTAAGGAACGATGA	TAAGGA	-5.867	7	ATG	hypothetical protein	UIS74607.1	Direct strand CDS
OL614104.1	#48	+	21583	22158	191	CGCATCACGGGGGCTTATGT	GGGGG	-6.08185	7	ATG	hypothetical protein	UIS74608.1	Direct strand CDS
OL614104.1	#49	+	22151	22753	200	AGATCAAAAGGATAAACCTT	AAGGA	-4.53508	8	ATG	hypothetical protein	UIS74609.1	Direct strand CDS
OL614104.1	#50	+	22805	26521	1238	AACTATGCGGGTATTTTTTT	GGGT	-3.54662	8	ATG	hypothetical protein	UIS74610.1	Direct strand CDS
OL614104.1	#51	+	26532	27020	162	AAACACATAATGGGGATTTT	TGGGGA	-5.1598	4	ATG	hypothetical protein	UIS74611.1	Direct strand CDS
OL614104.1	#52	+	27013	27756	247	AATCACGGGGCTTGAAATTA	GGGG	-2.83376	10	ATG	NUDIX hydrolase	UIS74612.1	Direct strand CDS
OL614104.1	#53	+	27827	28198	123	GACAACTCAAGGGGGGATTT	AAGGGGG	-9.08394	5	ATG	hypothetical protein	UIS74613.1	Direct strand CDS
OL614104.1	#54	+	28195	28626	143	CTGACTCCGGGGAAAACAAA	GGGGA	-4.15569	7	GTG	protein of unknown function DUF3268	UIS74614.1	Direct strand CDS
OL614104.1	#55	+	28744	28986	80	CAGGATAAACGGGGCCGCGA	AGGA	-3.60793	15	ATG	hypothetical protein	UIS74615.1	Direct strand CDS
OL614104.1	#56	+	29033	31654	873	CATATACTTGCGGGGGTTTT	GGGGGT	-8.33243	3	ATG	terminase	UIS74616.1	Direct strand CDS
OL614104.1	#57	+	31717	33498	593	TTTTTATTCAATGGTGCGCT	GGTG	-3.52041	4	ATG	portal protein	UIS74617.1	Direct strand CDS
OL614104.1	#58	+	33500	33958	152	GATGAGAAAAGGTGAGTGAT	AGGTGA	-7.95547	5	ATG	hypothetical protein	UIS74618.1	Direct strand CDS
OL614104.1	#59	+	33955	34104	49	GCCGTAGATCCCAGGATGGG	AGGA	-3.60793	4	ATG	hypothetical protein	UIS74619.1	Direct strand CDS
OL614104.1	#60	+	34076	35167	363	CCAACTTTCAAGGGGAAATC	AAGGGG	-5.83584	5	ATG	putative minor head protein	UIS74620.1	Direct strand CDS
OL614104.1	#61	+	35164	39279	1371	CATTTTAACGGTGGCAAAAA	GGTGG	-5.05813	6	ATG	helicase	UIS74621.1	Direct strand CDS
OL614104.1	#62	+	39276	39542	88	AACAATGGGGCGGCGGCAGT	GGGG	-2.83376	10	ATG	hypothetical protein	UIS74622.1	Direct strand CDS
OL614104.1	#63	+	39602	40456	284	AAATATTATCGGGGGTTACC	GGGGGT	-8.33243	4	GTG	putative prohead protease	UIS74623.1	Direct strand CDS
OL614104.1	#64	+	40468	41238	256	AAAATATAATGGAGTCTCAC	GGAG	-3.60793	6	ATG	hypothetical protein	UIS74624.1	Direct strand CDS
OL614104.1	#65	+	41302	42780	492	TCTATTTATGGTGGTGAAAT	GGTGGT	-6.42453	5	ATG	major capsid protein	UIS74625.1	Direct strand CDS
OL614104.1	#66	+	42851	43318	155	ATTATTTTTTTGAGGTTAAT	GAGGT	-5.85851	4	ATG	hypothetical protein	UIS74626.1	Direct strand CDS
OL614104.1	#67	+	43299	43580	93	AAGTAGCGGGACTAAGAAAA	GGGA	-3.65617	9	ATG	hypothetical protein	UIS74627.1	Direct strand CDS
OL614104.1	#68	+	43645	44730	361	TTTTTTTATCAGGGGGTTTT	AGGGGGT	-10.4074	3	ATG	putative head-to-tail adaptor protein	UIS74628.1	Direct strand CDS
OL614104.1	#69	+	44727	45401	224	GTACGGATCGAGGTGGCATC	GAGGTGG	-9.49319	4	ATG	hypothetical protein	UIS74629.1	Direct strand CDS
OL614104.1	#70	-	46167	45388	259	ACGATTACAAGGTAGGCAAC	AGGT	-3.49838	7	GTG	hypothetical protein	UIS74630.1	Complementary strand CDS
OL614104.1	#71	+	46203	47033	276	ATCGTGATGGGATAATGCAG	GTGAT	-3.73143	12	ATG	hypothetical protein	UIS74631.1	Direct strand CDS
OL614104.1	#72	+	47026	47247	73	TATTAACGGTAGAGGTTACG	GAGGT	-5.85851	4	ATG	hypothetical protein	UIS74632.1	Direct strand CDS
OL614104.1	#73	+	47247	48995	582	AGAAAATCAGAGGTGGAATA	GAGGTGG	-9.49319	4	ATG	tail sheath protein	UIS74633.1	Direct strand CDS
OL614104.1	#74	+	49006	49428	140	AACCGATTAAGGTGTAACCA	AGGTG	-5.59535	6	ATG	putative tail protein	UIS74634.1	Direct strand CDS
OL614104.1	#75	+	49496	49918	140	TTTATTTATGAGGTGTAAAA	GAGGTG	-7.95547	5	ATG	hypothetical protein	UIS74635.1	Direct strand CDS
OL614104.1	#76	+	49950	50084	44	TGAATGCGACTGAGGAAGAC	TGAGGA	-5.87344	4	ATG	hypothetical protein	UIS74636.1	Direct strand CDS
OL614104.1	#77	+	50087	53077	996	AGCTGGGAGGAATTATAATC	GGGAGG	-8.9792	10	ATG	hypothetical protein	UIS74637.1	Direct strand CDS
OL614104.1	#78	+	53079	54674	531	CACCTCTTTCGGGATATAAA	GGGA	-3.65617	6	ATG	hypothetical protein	UIS74638.1	Direct strand CDS
OL614104.1	#79	+	54671	55354	227	AACGGCAAGGAAACCAAAAA	AAGGA	-4.53508	9	ATG	putative baseplate central spike protein	UIS74639.1	Direct strand CDS
OL614104.1	#80	+	55356	55628	90	TGTGGATATAGGATTGTAAA	AGGA	-3.60793	7	ATG	putative baseplate central spike tip protein	UIS74640.1	Direct strand CDS
OL614104.1	#81	+	55630	56820	396	TCATGTCATAGGTGGTTAAA	AGGTGGTT	-9.76087	3	ATG	hypothetical protein	UIS74641.1	Direct strand CDS
OL614104.1	#82	+	56820	57440	206	AGCTTTAAGGAAGCCGCATA	TAAGGA	-5.867	9	ATG	putative baseplate protein	UIS74642.1	Direct strand CDS
OL614104.1	#83	+	57440	58528	362	GACACCGGAGAGGCTAACTA	GGAG	-3.60793	10	ATG	baseplate J-like protein	UIS74643.1	Direct strand CDS
OL614104.1	#84	+	58531	60180	549	ACTATTTCACAGGATTAATG	AGGA	-3.60793	6	ATG	hypothetical protein	UIS74644.1	Direct strand CDS
OL614104.1	#85	+	60194	60664	156	AAATTAAGAGGATTTTTTTT	GAGGA	-4.86934	8	ATG	baseplate protein	UIS74645.1	Direct strand CDS
OL614104.1	#86	+	60677	62677	666	AATTCTAAGCGGGGGCTGTA	GGGGG	-6.08185	5	ATG	protein of unknown function DUF4815	UIS74646.1	Direct strand CDS
OL614104.1	#87	+	62677	63894	405	GTAACGCCGGAGGCTCAATA	GGAGG	-6.85602	7	ATG	hypothetical protein	UIS74647.1	Direct strand CDS
OL614104.1	#88	+	63908	64846	312	AATTTAAAGGAGTGCTTATC	AAGGAG	-6.61001	8	GTG	hypothetical protein	UIS74648.1	Direct strand CDS
OL614104.1	#89	+	64928	65251	107	CAAAACAGAGGTATTTTTTT	GAGGT	-5.85851	8	ATG	holin	UIS74649.1	Direct strand CDS
OL614104.1	#90	+	65248	65943	231	ATCACGCTTTGGGTTCGCGT	GGGT	-3.54662	6	ATG	endolysin	UIS74650.1	Direct strand CDS
OL614104.1	#91	+	65940	66131	63	AAATATTCGGGGTACTTTGA	GGGGT	-5.08433	7	ATG	putative Rz protein	UIS74651.1	Direct strand CDS
OL614104.1	#92	+	66141	66542	133	TTATGAAGTGAGGGTTTAAA	TGAGGG	-5.05103	6	ATG	putative Rz1 protein	UIS74652.1	Direct strand CDS
OL614104.1	#93	+	66539	66808	89	TGGCTGAAAGGCGGAAAGAA	AAGG	-2.17496	9	ATG	hypothetical protein	UIS74653.1	Direct strand CDS
OL614104.1	#94	-	67098	66829	89	TGTTTTCTGAGGAACCATAA	TGAGGA	-5.87344	7	ATG	DNA-binding protein	UIS74654.1	Complementary strand CDS
OL614104.1	#95	-	68557	67109	482	GCTACAACAGGACGATAATT	AGGA	-3.60793	8	ATG	hypothetical protein	UIS74655.1	Complementary strand CDS
OL614104.1	#96	-	69951	68599	450	AGAATGTGACAGGGGGATTT	AGGGGG	-8.15678	4	ATG	ATPase	UIS74656.1	Complementary strand CDS
OL614104.1	#97	-	70838	69963	291	CCTGACTCAAAGGGGGATTT	AAGGGGG	-9.08394	4	ATG	exodeoxyribonuclease VII	UIS74657.1	Complementary strand CDS
OL614104.1	#98	+	70943	71167	74	ATTTTCGTAAGGGGGATATT	TAAGGGGG	-10.4159	5	ATG	hypothetical protein	UIS74658.1	Direct strand CDS
OL614104.1	#99	+	71167	72624	485	CTGTTGGAGGATGAATCCTG	GGAGG	-6.85602	10	ATG	helicase	UIS74659.1	Direct strand CDS
OL614104.1	#100	+	72630	73121	163	GCACATCAAGGATAAATATC	AAGGA	-4.53508	8	ATG	single-stranded DNA-binding protein	UIS74660.1	Direct strand CDS
OL614104.1	#101	+	73143	73469	108	TGACCGTGTAAGGAACCGAA	TAAGGA	-5.867	6	ATG	hypothetical protein	UIS74661.1	Direct strand CDS
OL614104.1	#102	+	73466	73795	109	GCAACATGGCGGGATAAAAA	GGGA	-3.65617	6	ATG	protein of unknown function DUF4406	UIS74662.1	Direct strand CDS
OL614104.1	#103	+	73811	74179	122	TGTGAAATAAGGGGAGATTT	TAAGGGG	-7.16777	6	ATG	hypothetical protein	UIS74663.1	Direct strand CDS
OL614104.1	#104	+	74172	74810	212	CCCGATGGGTGAGACAAAAA	GGGTGA	-8.00371	8	ATG	DNA methyltransferase	UIS74664.1	Direct strand CDS
OL614104.1	#105	+	74807	75034	75	GATCTTTTAGGTGACTTATC	AGGTGA	-7.95547	6	ATG	hypothetical protein	UIS74665.1	Direct strand CDS
OL614104.1	#106	+	75027	75479	150	CAGCGCCGGAGGGGTGGATA	GGGGTGG	-8.71901	3	ATG	hypothetical protein	UIS74666.1	Direct strand CDS
OL614104.1	#107	+	75463	75771	102	ATTCGAGGGGAGAGTAAGTT	GGGGAG	-6.23063	8	ATG	hypothetical protein	UIS74667.1	Direct strand CDS
OL614104.1	#108	+	75830	76339	169	TGCCTATCAATGGGGGATTT	GGGGG	-6.08185	4	ATG	putative nuclease	UIS74668.1	Direct strand CDS
OL614104.1	#109	+	76517	79285	922	TTGAGGAATTCCGCGCTTTC	TGAGGA	-5.87344	13	ATG	DNA primase/helicase	UIS74669.1	Direct strand CDS
OL614104.1	#110	-	79596	79333	87	CATAAAAACTCAGGGGGCTT	AGGGGG	-8.15678	3	ATG	hypothetical protein	UIS74670.1	Complementary strand CDS
OL614104.1	#111	-	80481	79624	285	GTTAAAGAGGAAACCAGACA	GAGGA	-4.86934	9	ATG	hypothetical protein	UIS74671.1	Complementary strand CDS
OL614104.1	#112	-	80741	80478	87	TTATGAGGGAGTACGGAACA	AGGGAG	-6.27381	9	ATG	hypothetical protein	UIS74672.1	Complementary strand CDS
OL614104.1	#113	-	80985	80707	92	TAAAGAGGCGACGATCAGTT	GAGG	-3.60793	12	ATG	hypothetical protein	UIS74673.1	Complementary strand CDS
OL614104.1	#114	-	81445	80951	164	CTACTCAAAAGGGTTTTACA	AAGGG	-3.71267	7	ATG	hypothetical protein	UIS74674.1	Complementary strand CDS
OL614104.1	#115	-	81920	81426	164	ATTAAGGTGAGGGTCATCAA	AGGTGA	-7.95547	10	ATG	hypothetical protein	UIS74675.1	Complementary strand CDS
OL614104.1	#116	-	82091	81936	51	ATCAACAAAAGGAAAATAAC	AAGGA	-4.53508	7	ATG	hypothetical protein	UIS74676.1	Complementary strand CDS
OL614104.1	#117	-	82695	82312	127	CTGCTGATGAAGTTGCGGAA	GGA	-1.533	1	ATG	hypothetical protein	UIS74677.1	Complementary strand CDS
OL614104.1	#118	-	83266	82751	171	AAACCGGGGGTTACCACAAA	GGGGGT	-8.33243	9	ATG	hypothetical protein	UIS74678.1	Complementary strand CDS
OL614104.1	#119	-	83574	83263	103	ACGGTTTTAACGGGGGATCT	GGGGG	-6.08185	4	ATG	hypothetical protein	UIS74679.1	Complementary strand CDS
OL614104.1	#120	-	83863	83585	92	GCTTTTGGGGGAAAAGCACA	GGGGG	-6.08185	9	ATG	hypothetical protein	UIS74680.1	Complementary strand CDS
OL614104.1	#121	-	84242	83922	106	TTAATCTGGGGATTAAAATT	TGGGGA	-5.1598	8	ATG	hypothetical protein	UIS74681.1	Complementary strand CDS
OL614104.1	#122	-	85072	84344	242	ATCACTGAGGTAATTTTATC	GAGGT	-5.85851	9	ATG	hypothetical protein	UIS74682.1	Complementary strand CDS
