# Supplementary material for: Morganella Phage Mecenats66 Utilizes an Evolutionarily Distinct Subtype of Headful Genome Packaging with a Preferred Packaging Initiation Site
Source: Microorganisms. 2022 Sep 7;10(9):1799. doi: 10.3390/microorganisms10091799 (PMC9503643; doi:10.3390/microorganisms10091799)
Supplement: Supplementary file 1 [file microorganisms-10-01799-s001.zip › SupplementaryTableS2.xlsx]

## Sheet: Sheet1
Restriction fragments of Mecenats66 genome
Restrictase	AanI		EcoRI		EheI		SmaI		SmiI
Zone	Expected	Observed	Expected	Observed	Expected	Observed	Expected	Observed	Expected	Observed
#1	10552	~	16561	~	30579	Indiscernible	8749	-	28271	Indiscernible
#2	7979	~	9963	~	26074	Indiscernible	7219	-	27795	Indiscernible
#3	7596	Indiscernible	5601	~	19671	Indiscernible	5877	-	26023	Indiscernible
#4	7484	Indiscernible	5430	~	7426	-	4755	-	2635	~
#5	4836	Indiscernible	4797	~	2230	~	4427	-	1434	~
#6	4645	Indiscernible	4623	~	213	-	4092	-	35	-
#7	4212	Indiscernible	4092	~	N/A		3744	-	N/A
#8	4073	~	3478	~	N/A		3595	-	N/A
#9	3769	Indiscernible	3428	~	N/A		3523	-	N/A
#10	3229	Indiscernible	3325	~	N/A		3459	-	N/A
#11	3199	Indiscernible	2944	~	N/A		3177	-	N/A
#12	3098	Indiscernible	2636	~	N/A		3143	-	N/A
#13	3099	Indiscernible	2416	~	N/A		3111	-	N/A
#14	2338	~	1961	~	N/A		2789	-	N/A
#15	2059	Indiscernible	1743	~	N/A		2618	-	N/A
#16	1962	Indiscernible	1702	~	N/A		2467	-	N/A
#17	1854	Indiscernible	1439	~	N/A		2237	-	N/A
#18	1581	~	1313	-	N/A		1855	-	N/A
#19	1200	Indiscernible	1266	-	N/A		1841	-	N/A
#20	1155	Indiscernible	1255	-	N/A		1712	-	N/A
#21	1068	Indiscernible	754	~	N/A		1697	-	N/A
#22	882	Indiscernible	617	-	N/A		1688	-	N/A
#23	866	Indiscernible	582	-	N/A		1424	-	N/A
#24	856	Indiscernible	177	-	N/A		1390	-	N/A
#25	781	Indiscernible	N/A		N/A		1177	-	N/A
#26	555	~	N/A		N/A		1121	-	N/A
#27	372	Indiscernible	N/A		N/A		968	-	N/A
#28	363	Indiscernible	N/A		N/A		854	-	N/A
#29	309	-	N/A		N/A		449	-	N/A
#30	193	-	N/A		N/A		385	-	N/A
#31	149	-	N/A		N/A		194	-	N/A
#32	91	-	N/A		N/A		171	-	N/A
#33	N/A		N/A		N/A		155	-	N/A
#34	N/A		N/A		N/A		54	-	N/A
#35	N/A		N/A		N/A		40	-	N/A
#36	N/A		N/A		N/A		36	-	N/A
