# Supplementary material for: Morganella Phage Mecenats66 Utilizes an Evolutionarily Distinct Subtype of Headful Genome Packaging with a Preferred Packaging Initiation Site
Source: Microorganisms. 2022 Sep 7;10(9):1799. doi: 10.3390/microorganisms10091799 (PMC9503643; doi:10.3390/microorganisms10091799)
Supplement: Supplementary file 1 [file microorganisms-10-01799-s001.zip › SupplementaryTableS3.xlsx]

## Sheet: accessions
Accession of TerL/terminase aa sequence	Originating phage
UIS74616	Morganella_phage_Mecenats66
QNJ57308	Pseudomonas_phage_Dolphis
YP_009792721	Bordetella_phage_vB_BbrM_PHB04
AAA88220	Salmonella_phage_LP7
AAC34148	Escherichia_phage_186
AAF03961	Hamiltonella_phage_APSE-1
AAF23757	Escherichia_phage_RB49
AAQ12192	Shigella_phage_Sf6
AAQ54982	Burkholderia_phage_Bcep22
ABQ88401	Escherichia_phage_CUS-3
AGG36517	Escherichia_phage_P2
AGR46580	Bacillus_phage_Basilisk
AHC56597	Achromobacter_phage_JWDelta
AOZ61694	Bacillus_phage_BJ4
AOZ62321	Bacillus_phage_SBP8a
BAG12600	Enterobacteria_phage_P22
CAJ28416	Yersinia_phage_PY100
NP_037663	Escherichia_phage_HK022
NP_037698	Escherichia_phage_HK97
NP_040581	Escherichia_phage_Lambda
NP_042010	Escherichia_phage_T7
NP_046897	Escherichia_phage_N15
NP_049511	Escherichia_phage_933W
NP_049776	Escherichia_phage_T4
NP_050632	Escherichia_phage_Mu
NP_052122	Yersinia_phage_phiYeO3-12
NP_490600	Pseudomonas_phage_phiCTX
NP_523347	Escherichia_phage_T3
NP_720326	Salmonella_phage_ST64T
NP_803591	Pseudomonas_phage_phiKZ
NP_899601	Vibrio_phage_KVP40
NP_938233	Pseudomonas_phage_D3112
YP_001468454	Listeria_phage_A511
YP_001469154	Pseudomonas_phage_MP22
YP_001956731	Pseudomonas_phage_201phi2-1
YP_002117560	Rhizobium_phage_16-3
YP_002128452	Iodobacteriophage_phiPLPE
YP_002300330	Bacillus_phage_SPO1
YP_004301396	Brochothrix_phage_A9
YP_007002934	Haemophilus_phage_SuMu
YP_007005834	Erwinia_phage_EamP-S6
YP_007237828	Erwinia_phage_phiEaH2
YP_007392855	Klebsiella_phage_JD001
YP_008873483	Bacillus_phage_vB_BanS-Tsamsa
YP_024701	Burkholderia_phage_BcepMu
YP_164067	Psedumonas_phage_B3
YP_398598	Clostridium_phage_c-st
YP_950546	Escherichia_phage_N4
YP_009042525	Staphylococcus_phage_6ec
YP_238728	Staphylococcus_phage_Twort
YP_009275769	Staphylococcus_phage_Stau2
YP_002790770	Lactobacillus_phage_Lb338-1
YP_009636912	Mycobacterium_phage_LittleE
YP_009625682	Bacillus_phage_SIOphi
YP_009011901	Mycobacterium_phage_Courthouse
YP_009104094	Shewanella_sp._phage_1/40
YP_009100401	Shewanella_sp._phage_1/4
YP_009111282	Escherichia_phage_Av-05
YP_009829959	Salmonella_phage_35
YP_009100399	Shewanella_sp._phage_1/4
YP_010090597	Pseudomonas_phage_PspYZU05
YP_009200426	Yersinia_phage_vB_YenM_TG1
YP_010075058	Salmonella_phage_SG1
YP_010114678	Bacillus_phage_WhyPhy
YP_009277923	Gordonia_phage_Nyceirae
YP_009835295	Lactobacillus_phage_LpeD
YP_009846225	Aeromonas_phage_2L372D
YP_009842193	Arthrobacter_phage_Mendel
YP_009842164	Arthrobacter_phage_Anjali
YP_006560808	Salmonella_phage_vB_SosS_Oslo
YP_009042527	Staphylococcus_phage_6ec
YP_009222141	Vibrio_phage_qdvp001
YP_007236598	TerL_Staphylococcus_phage_StB27
YP_009791523	Pseudoalteromonas_phage_J2-1
YP_009799912	Staphylococcus_phage_phiSA_BS2
YP_006561262	Streptococcus_phage_YMC-2011
YP_007006567	Agrobacterium_phage_7-7-1
YP_009597850	Pseudomonas_phage_PA5
YP_009854631	Flavobacterium_phage_vB_FspS_filifjonk9-1
YP_009797275	Faecalibacterium_phage_FP_Lugh
YP_009807281	Eggerthella_phage_PMBT5
YP_009113150	Salmonella_phage_LSPA1
YP_009323718	Flavobacterium_phage_Fpv10
YP_003344848	Streptococcus_phage_ALQ13.2
YP_009900653	Lactococcus_phage_Q33
YP_010110021	Enterococcus_phage_AE4_17
YP_009219403	(endogenous_virus)_Clostridium_phage_phiCT9441A
YP_009273224	Gordonia_phage_GMA1
YP_009168782	Escherichia_phage_K1G
YP_006383455	Bacillus_phage_PBC1
YP_005098068	Pseudomonas_phage_phi297
YP_006906634	Salmonella_phage_SSU5
YP_009275505	Pseudomonas_phage_JBD44
YP_006561164	Staphylococcus_phage_Ipla7
YP_009620680	Pseudomonas_phage_nickie
YP_009603889	Enterococcus_phage_IMEEF1
YP_009352426	Rhizobium_phage_RHEph10
YP_009290174	Weissella_phage_WCP30
YP_010356946	Olleya_phage_Harreka_1
YP_009823116	Rheinheimera_phage_vB_RspM_Barba19A
YP_010052937	Aeromonas_phage_2_D05
YP_008241980	Cellulophaga_phage_phi10:1
YP_009837298	Bacillus_phage_Carmen17
YP_003347326	Enterococcus_phage_phiFL2A
YP_008130333	Serratia_phage_Eta
YP_009786238	Staphylococcus_phage_vB_SscM-1
YP_009835413	Leptospira_phage_LE3
YP_007236688	Lactobacillus_phage_ATCC8014
YP_112491	Flavobacterium_phage_11b
YP_007003633	Riemerella_phage_RAP44
YP_005087227	Rhodococcus_phage_REQ3
YP_009600047	Geobacillus_phage_TP-84
YP_009808589	Vibrio_phage_vB_VpS_PG07
YP_009818438	Streptomyces_phage_Hiyaa
YP_010054008	Salmonella_phage_Akira
YP_005087026	Rhodococcus_phage_RRH1
YP_009795331	Pectobacterium_phage_DU_PP_V
YP_006906397	Pectobacterium_phage_My1
YP_008059213	Halovirus_HGTV-1
YP_004306624	Tequintavirus_SPC35
YP_009597511	Klebsiella_phage_vB_Kpn_IME260
YP_007010972	Salmonella_phage_SPN3UB
YP_007007962	Vibrio_phage_pVp-1
YP_001468786	TerL_Listeria_phage_P35
YP_009208355	Clostridium_phage_phiCD111
YP_009207608	Vibrio_phage_phi_3
YP_009599184	Providencia_phage_vB_PreS_PR1
YP_009854777	Flavobacterium_phage_vB_FspS_hemulen6-1
YP_008130148	,_partial_Rhizobium_phage_RR1-A
YP_007675325	Sulfitobacter_phage_pCB2047-C
YP_009801483	Microbacterium_phage_Appa
YP_007675349	Cyanophage_MED4-117
YP_009044184	Listeria_phage_LP-026
YP_009620569	Proteus_phage_PM135
YP_010358397	Halorubrum_virus_HRTV-29
YP_009797045	Faecalibacterium_phage_FP_Brigit
YP_010078148	Ralstonia_phage_Raharianne
YP_009603861	Roseobacter_phage_RDJL_Phi_2
YP_005098309	Synechococcus_phage_S-CBS4
YP_009822972	Rheinheimera_phage_vB_RspM_Barba18A
YP_009215306	Streptomyces_phage_YDN12
YP_009218022	Streptomyces_phage_phiSAJS1
YP_009226059	Pseudoalteromonas_phage_Pq0
YP_009291948	Acinetobacter_phage_LZ35
YP_010090599	Pseudomonas_phage_PspYZU05
NP_862877	Streptococcus_phage_SM1
YP_009613892	Edwardsiella_phage_eiAU
YP_009200428	Yersinia_phage_vB_YenM_TG1
YP_009177646	Dhillonvirus_SSL2009a
YP_009284027	Escherichia_phage_HY03
NP_112694	Lactococcus_phage_TP901-1
YP_009624257	Microbacterium_phage_Pikmin
YP_004306925	Streptococcus_phage_Dp-1
YP_009818834	Microbacterium_phage_Schubert
YP_009849855	Panteoa_phage_Kyle
YP_009908578	Microbacterium_phage_McGalleon
NP_046964	Methanobacterium_phage_psiM2
YP_009620857	Pseudomonas_phage_tabernarius
YP_009807586	Gordonia_phage_Fryberger
NP_996704	TerL_Lactococcus_phage_phiLC3
YP_009908641	Microbacterium_phage_MonChoix
YP_009624143	Microbacterium_phage_Golden
YP_009815907	Microbacterium_phage_Goodman
YP_009604678	Pseudomonas_phage_vB_PaeM_G1
YP_009624201	Microbacterium_phage_Koji
YP_009800690	TerL_Burkholderia_phage_vB_BmuP_KL4
YP_007674030	Vibrio_phage_pYD21-A
YP_009125478	Mycobacterium_phage_Milly
YP_009211089	Mycobacterium_phage_Enkosi
YP_009951774	Mycobacterium_phage_Amgine
YP_009953891	Mycobacterium_phage_SirPhilip
YP_009952437	Mycobacterium_phage_AlishaPH
YP_009953098	Mycobacterium_phage_KiSi
YP_010054237	Shigella_phage_DS8
YP_009593385	Acinetobacter_phage_YMC11/11/R3177
YP_009702213	Pectinobacterium_phage_PEAT2
YP_009813047	Escherichia_phage_FEC19
YP_009952997	Mycobacterium_phage_Curiosium
YP_004251070	Vibrio_phage_ICP1
YP_009002658	Mycobacterium_phage_Validus
YP_009785409	Caulobacter_phage_Sansa
YP_009200235	Pseudoalteromonas_phage_H103
YP_009638566	Mycobacterium_phage_macncheese
YP_006382528	Pseudomonas_phage_tf
YP_009954086	Mycobacterium_phage_Yuna
YP_009950156	Mycobacterium_phage_Aminay
YP_006907045	Pseudomonas_phage_UFV-P2
YP_007379015	Halovirus_HVTV-1
YP_008059146	Halovirus_HCTV-5
YP_009304261	Gordonia_phage_Lucky10
YP_009950444	Mycobacterium_phage_Taquito
YP_010245868	Gordonia_phage_Neville
NP_203458	Myxococcus_phage_Mx8
YP_001671939	Bruynoghevirus_LUZ24
YP_008059665	Halovirus_HCTV-1
YP_009818237	Lactobacillus_phage_Lpa804
YP_009623040	Microbacterium_phage_Eleri
YP_009963603	Mycobacterium_phage_MooMoo
YP_009887268	Arthrobacter_phage_Abba
YP_009279501	Lactococcus_phage_28201
YP_009622532	Pseudomonas_phage_Bjorn
YP_009844051	Lactobacillus_phage_3-521
YP_009883979	Arthrobacter_phage_Vibaki
YP_008857873	Arthrobacter_phage_vB_ArS-ArV2
YP_009596924	Propionibacterium_phage_Doucette
YP_010052428	Xanthomonas_phage_XPP1
YP_009601635	Arthrobacter_phage_Martha
YP_009996789	Microbacterium_phage_BonaeVitae
YP_010357466	Cellulophaga_phage_Nekkels_1
YP_001467938	Thermus_phage_P23-45
YP_001468706	Listeria_phage_B054
YP_009639427	Holosalinivirus_M8CR302
YP_009996588	Microbacterium_phage_PaoPu
YP_009802601	Microbacterium_phage_Krampus
YP_009996816	Microbacterium_phage_Efeko
YP_009850644	Serratia_phage_MyoSmar
NP_852753	Haemophilus_phage_Aaphi23
YP_009819145	Carpasinavirus_XcP1
YP_009812625	Microbacterium_phage_OneinaGillian
YP_009808178	Microbacterium_phage_Neferthena
YP_010052626	Xanthomonas_virus_phiXaf18
YP_164748	Lactobacillus_phage_LP65
YP_009072431	,_partial_Halovirus_VNH-1
YP_009601488	Arthrobacter_phage_Brent
YP_009303071	Arthrobacter_phage_BarretLemon
YP_009610017	Arthrobacter_phage_Colucci
YP_009793613	Listeria_phage_LMTA-94
YP_009885082	Arthrobacter_phage_Mufasa8
YP_010246258	Gordonia_phage_Octobien14
YP_009819675	Arthrobacter_phage_Sonali
YP_009595351	Pseudomonas_phage_phiPMW
YP_004782379	Salmonella_phage_7-11
YP_006987652	Cronobacter_phage_vB_CsaP_GAP52
YP_009014963	Cronobacter_phage_CR9
YP_009194527	Mycobacterium_phage_Quico
YP_009042806	Anabaena_phage_A-4L
YP_009103274	Shewanella_sp._phage_1/41
YP_009191297	Arthrobacter_phage_Decurro
YP_009833449	Cronobacter_phage_vB_CsaP_009
YP_009881676	Arthrobacter_phage_KBurrousTX
YP_010052775	Ralstonia_phage_Bakoly
YP_008770509	Bacillus_phage_Page
YP_009151470	Bacillus_phage_Pascal
YP_009792183	Brevibacterium_phage_LuckyBarnes
YP_009836182	Pseudomonas_phage_PMBT14
YP_009847104	Aeromonas_phage_4_4572
YP_001504114	Enterococcus_phage_EF24C
YP_009884404	Arthrobacter_phage_TripleJ
YP_009914679	Escherichia_phage_D6
YP_009801560	Microbacterium_phage_Hyperion
YP_009855460	Flavobacterium_phage_vB_FspS_tant8-1
YP_007151672	Escherichia_phage_HK106
YP_009609692	Acidovorax_phage_ACP17
YP_002284336	Pseudomonas_phage_PAJU2
YP_009292393	Gordonia_phage_Eyre
YP_009795481	Gordonia_phage_BENtherdunthat
YP_007002481	Pseudomonas_phage_JG004
YP_008410675	Mycobacterium_phage_Jabbawokkie
YP_001294855	TerL_Burkholderia_phage_BcepNY3
YP_005087046	Rhodococcus_phage_REQ2
YP_223983	Alphaproteobacteria_virus_phiJl001
YP_008129757	Mycobacterium_phage_Leo
YP_008410399	Mycobacterium_phage_Wanda
YP_007011072	Liberibacter_phage_SC1
YP_009834234	Lentibacter_virus_vB_LenP_ICBM2
YP_006906086	Escherichia_phage_NJ01
YP_009010473	Geobacillus_phage_GBK2
YP_009209673	Polaribacter_phage_P12002L
YP_010013924	Mycobacterium_phage_MrMagoo
YP_762597	Lactococcus_phage_Q54
YP_009604872	Mycobacterium_phage_Bongo
YP_009036001	Escherichia_phage_e4/1c
YP_009834291	Siovirus_germanense
YP_009222880	Vibrio_phage_eugene_12A10
YP_009304770	Acinetobacter_phage_vB_AbaM_phiAbaA1
YP_009225655	Pseudoalteromonas_phage_H101
YP_009813879	Acinetobacter_phage_vB_AbaM_B09_Aci05
YP_010001220	Gordonia_phage_William
YP_009855685	Alteromonas_phage_vB_AmeM_PT11-V22
YP_007004321	Enterobacteria_phage_IME10
YP_005087318	Rhodococcus_phage_REQ1
YP_009620439	Gordonia_phage_Gustav
NP_043560	Ceduovirus_c2
YP_004327307	Erwinia_phage_phiEt88
YP_009854502	Flavobacterium_phage_vB_FspM_lotta8-1
YP_009624492	Enterobacter_phage_Ec_L1
YP_009815136	Microbacterium_phage_Armstrong
YP_009818304	Pantoea_phage_vB_PagS_AAS23
YP_008408663	Mycobacterium_phage_Whirlwind
YP_009602437	Arthrobacter_phage_Bennie
YP_009602622	Arthrobacter_phage_HunterDalle
YP_009803059	Gordonia_phage_Trine
YP_009806781	Microbacterium_phage_Eden
YP_006987833	Escherichia_phage_vB_EcoS_ACG-M12
YP_009602932	Arthrobacter_phage_Wayne
YP_009304116	Gordonia_phage_Guacamole
YP_009620508	Gordonia_phage_Mahdia
YP_009814919	Cronobacter_phage_CS01
YP_010064662	Escherichia_phage_vB_EcoS_W011D
YP_009904928	Escherichia_phage_Henu8
YP_398965	Rtpvirus_Rtp
YP_009618006	Tlsvirus_SP126
YP_009055343	Escherichia_phage_vB_EcoS_AHS24
YP_009824497	Escherichia_phage_vB_Eco_mar001J1
YP_009800868	Escherichia_phage_vB_EcoS_IME347
YP_010064783	Escherichia_phage_Henu7
YP_010012973	Mycobacterium_phage_GuuelaD
YP_009824912	Escherichia_phage_vB_EcoS_IME542
YP_010114608	Flavobacterium_phage_vB_FspM_immuto_2-6A
YP_006907178	Streptomyces_phage_TG1
YP_008051122	Pseudoalteromonas_phage_RIO-1
YP_009594349	Arthrobacter_phage_Galaxy
YP_009596751	Propionibacterium_phage_Anatole
NP_813693	Lomovskayavirus_BT1
YP_009594156	Escherichia_phage_JMPW2
YP_009594300	Arthrobacter_phage_Jasmine
YP_009300786	Gordonia_phage_BaxterFox
YP_010051474	Mycobacterium_phage_Avocado
YP_010101310	Mycobacterium_phage_Silverleaf
YP_009220341	Achromobacter_phage_phiAxp-1
YP_009284652	Escherichia_phage_vB_EcoS_NBD2
YP_007006119	Cyanophage_S-TIM5
YP_010089985	Vibrio_phage_pVco-5
YP_010013503	Mycobacterium_phage_Kumao
YP_001294797	Microbacterium_phage_Min1
YP_006383611	Xanthomonas_phage_vB_XveM_DIBBI
YP_009615752	Gordonia_phage_Lennon
YP_010080155	Paenibacillus_phage_Dragolir
YP_009837857	Xanthomonas_phage_RiverRider
YP_010002136	Gordonia_phage_Ribeye
YP_006489258	Colwellia_phage_9A
YP_009818562	Arthrobacter_phage_Maja
YP_009883716	Stenotrophomonas_phage_Pokken
YP_009198606	Vibrio_phage_phi_1
YP_010001464	Gordonia_phage_Tiamoceli
YP_009884386	Sinorhizobium_phage_ort11
NP_944884	Salmonella_phage_FelixO1
YP_010107140	Agrobacterium_phage_OLIVR1
YP_010002563	Gordonia_phage_Lilbeanie
YP_004327020	Erwinia_phage_phiEa104
YP_009007465	Erwinia_phage_Ea9-2
YP_009195362	Klebsiella_phage_KLPN1
YP_009275362	Gordonia_phage_Splinter
YP_009620266	Corynebacterium_phage_Darwin
YP_009882059	Klebsiella_phage_Pylas
YP_010115074	Salmonella_phage_vB_SalP_TR2
YP_010357872	Halorubrum_virus_HATV-3
YP_010077851	Stenotrophomonas_phage_IME-SM1
YP_009289811	Gordonia_phage_Hedwig
YP_009882947	Pseudomonas_phage_Zuri
YP_009832323	Pectobacterium_phage_vB_PatP_CB1
YP_009303157	Mycobacterium_phage_Bipper
YP_009007658	Acinetobacter_phage_Presley
YP_009796784	Streptomyces_phage_Attoomi
YP_009801850	Quhwahvirus_paschalis
YP_009802772	Microbacterium_phage_Metamorphoo
YP_009812599	Escherichia_phage_C130_2
YP_009815689	Arthrobacter_phage_Andrew
YP_009848392	Rhodococcus_phage_Whack
YP_009196076	Mannheimia_phage_vB_MhM_3927AP2
YP_009291957	Gordonia_phage_CarolAnn
YP_009622064	Microbacterium_phage_Dismas
YP_010049678	Mycobacterium_phage_Typha
YP_004306103	Clostridium_phage_phiCD6356
YP_009601206	Sinorhizobium_phage_phiM7
YP_010083902	Lactococcus_phage_PLgW-1
YP_001552334	Mycobacterium_phage_Giles
YP_009273330	Bacillus_phage_vB_BhaS-171
YP_009777716	uncultured_phage_MedDCM-OCT-S35-C6
YP_001469235	Mycobacterium_phage_Tweety
YP_009226668	Lactococcus_phage_GE1
YP_009626515	Corynebacterium_phage_Poushou
YP_010050945	Gordonia_phage_Schmidt
YP_009841669	Mycobacterium_phage_Fowlmouth
YP_007003376	Bacillus_phage_SP-10
YP_006560758	Burkholderia_phage_vB_BceS_KL1
YP_010080302	Leuconostoc_phage_LDG
YP_009802677	Microbacterium_phage_MementoMori
YP_001468641	Listeria_phage_B025
YP_007006950	Pectobacterium_phage_ZF40
YP_008769988	Bacillus_phage_CampHawk
YP_009837076	Mycobacterium_phage_Cuke
YP_010050796	Gordonia_phage_Catfish
YP_009168340	Leuconostoc_phage_1-A4
YP_007674510	Synechococcus_phage_S-SKS1
YP_009592085	Streptomyces_phage_phiCAM
YP_008050863	Streptomyces_phage_Lika
YP_008771935	Bacillus_phage_Slash
YP_009134344	Synechococcus_phage_ACG-2014f
YP_009791281	Synechococcus_phage_Bellamy
YP_010055618	Streptomyces_phage_Daudau
YP_010054649	Streptomyces_phage_Yosif
YP_010055059	Streptomyces_phage_Hank144
YP_009815760	Arthrobacter_phage_Coral
YP_007677269	Synechococcus_phage_S-SSM4
YP_009302203	Cyanophage_S-RIM50
YP_008125637	Synechococcus_phage_S-CAM8
YP_006990556	Clostridium_phage_phiMMP04
YP_009098951	Caulobacter_phage_Cr30
YP_009321397	Synechococcus_phage_S-CAM3
YP_009323073	Synechococcus_phage_S-CAM7
YP_010090443	Synechococcus_phage_S-H35
YP_010055295	Streptomyces_phage_Amethyst
YP_009810942	Synechococcus_phage_S-T4
YP_009816042	Synechococcus_phage_S-P4
NP_510983	Listeria_phage_PSA
YP_009783259	Cyanophage_S-RIM44
YP_009134607	Synechococcus_phage_ACG-2014e
YP_009855842	Arawnvirus_arawn
YP_009146146	Casadabanvirus_LPB1
YP_009007671	Staphylococcus_phage_vB_SepS_SEP9
YP_009291332	Gordonia_phage_Phinally
YP_009889556	Erwinia_phage_phiEaP8
YP_010065096	Vibrio_virus_2019VC1
YP_010000092	Serratia_phage_JS26
YP_001449292	Enterobacteria_phage_BP-4795
YP_009874134	Lactococcus_phage_fd13
NP_835553	hypothetical_protein_SA1777_Staphylococcus_phage_phiN315
YP_239799	Staphylococcus_phage_2638A
YP_009016182	TerL_Rhodococcus_phage_ReqiPine5
YP_004286250	Tsukamurella_phage_TPA2
YP_009804660	Pseudomonas_phage_phCDa
YP_010054570	Streptomyces_phage_Celia
YP_009777999	uncultured_phage_MedDCM-OCT-S39-C11
YP_008058384	Halovirus_HCTV-2
YP_009009720	Vibrio_phage_PVA1
YP_009785518	Caulobacter_phage_Seuss
YP_009322539	Synechococcus_phage_S-CAM9
YP_010002659	Gordonia_Phage_Zitch
YP_009964028	Mycobacterium_phage_Rem711
YP_009777747	uncultured_phage_MedDCM-OCT-S30-C28
YP_009607938	Mycobacterium_phage_SirDuracell
YP_009777825	uncultured_phage_MedDCM-OCT-S45-C18
YP_010082063	Ralstonia_phage_Dina
YP_010050625	Mycobacterium_phage_phiT46-1
YP_004935746	Gordonia_phage_GTE5
YP_003090178	Burkholderia_phage_KS9
YP_009215811	Bacillus_phage_JL
YP_009819464	Shigella_phage_vB_SsoS_008
YP_009777675	uncultured_phage_MedDCM-OCT-S42-C7
YP_006383506	Clostridium_phage_PhiS63
YP_009098712	Lactobacillus_phage_Ld3
YP_009198346	Mycobacterium_phage_Phayonce
YP_010092689	Gordonia_phage_Patio
YP_010097427	Gordonia_phage_Pleakley
YP_009778119	uncultured_phage_MedDCM-OCT-S28-C10
YP_007673755	Prochlorococcus_phage_MED4-213
YP_005087127	Rhodococcus_phage_RER2
YP_009301444	Gordonia_phage_Emalyn
YP_009275691	TerL_Gordonia_phage_Gsput1
YP_010062136	Mycobacterium_phage_MyraDee
YP_010050877	Gordonia_phage_Dardanus
YP_008771834	Bacillus_phage_Blastoid
NP_858953	Xanthomonas_phage_Xp10
YP_001994743	Mycobacterium_phage_DD5
YP_007676457	Synechococcus_phage_S-RIP1
YP_009783953	Rhizobium_phage_RHEph01
YP_009304030	Brucella_phage_BiPBO1
YP_010051026	Gordonia_phage_TinaLin
YP_005098205	Detrevirus_PMG1
YP_009607482	Mycobacterium_phage_Twister
YP_009276929	(endogenous_virus)_Clostridium_phage_phiCT19406B
YP_009013467	Mycobacterium_phage_Kugel
NP_058441	Staphylococcus_phage_PVL
YP_009607570	Mycobacterium_phage_Timshel
YP_007004362	Bacillus_phage_phIS3501
YP_008060340	Halovirus_HHTV-2
YP_009806850	Gordonia_phage_Apricot
YP_009821445	Gordonia_phage_GodonK
YP_512312	Bacillus_phage_Fah
YP_008766995	Cyanophage_PP
YP_009614528	Mycobacterium_phage_Rockstar
YP_007518386	Rhodobacter_phage_RcapNL
YP_010062914	Mycobacterium_phage_ICleared
YP_009269034	Gordonia_phage_KatherineG
YP_010062307	Mycobacterium_phage_Kimona
YP_009803125	Microbacterium_phage_Zeta1847
YP_009815620	Arthrobacter_phage_Yang
YP_008058573	Halorubrum_tailed_phage_8
YP_007392386	Staphylococcus_phage_phi7401PVL
YP_008126251	Mycobacterium_phage_Jobu08
YP_009209050	Mycobacterium_phage_Sheen
YP_009281104	Gordonia_phage_Ghobes
YP_009796836	Streptomyces_phage_Rowa
YP_010062047	Mycobacterium_phage_Anthony
YP_001285808	Geobacillus_virus_E2
YP_010049610	Gordonia_phage_Archimedes
YP_009100110	Mesorhizobium_phage_vB_MloP_Lo5R7ANS
YP_009815345	Arthrobacter_phage_DrManhattan
YP_009639352	Kryptosalinivirus_M8CC19
YP_010106486	Enterococcus_phage_nattely
YP_010113723	Enterococcus_phage_9183
YP_009829876	Bacillus_phage_phi105
YP_006582	Klebsiella_phage_phiKO2
YP_007003202	Lactobacillus_phage_LF1
YP_007001268	Caulobacter_virus_Karma
YP_009007286	Mycobacterium_phage_Oaker
YP_009099850	Rhizobium_phage_vB_RleM_P10VF
YP_007001264	Caulobacter_phage_CcrRogue
YP_008767308	Lactobacillus_phage_PL-1
NP_543088	Enterobacteria_phage_phiP27
YP_355415	Burkholderia_phage_Bcep176
YP_009152978	Streptococcus_phage_SpSL1
YP_009218063	(endogenous_virus)_Clostridium_phage_phiCT19406C
YP_009786011	Lactobacillus_phage_P1
YP_010358195	Halorubrum_virus_HRTV-27
NP_945032	Burkholderia_phage_phi1026b
YP_009017589	Psychrobacter_phage_Psymv2
YP_009301082	Gordonia_phage_Yvonnetastic
YP_009796724	Streptomyces_phage_AbbeyMikolon
YP_764473	Geobacillus_phage_GBSV1
NP_852588	Bacillus_phage_phBC6A52
YP_002727892	Enterococcus_phage_EFAP-1
YP_009217926	(endogenous_virus)_Clostridium_phage_phiCT453B
YP_009301363	Gordonia_phage_Kita
YP_010082102	Lactococcus_phage_CHPC971
YP_010096985	Gordonia_phage_NatB6
YP_010098003	Gordonia_phage_Marietta
YP_009820987	Synechococcus_phage_S-B28
YP_001039919	Streptococcus_phage_phi3396
YP_002925165	Streptococcus_phage_PH10
YP_008320338	Paenibacillus_phage_phiIBB_P123
YP_009036834	Lactococcus_phage_P078
YP_009224267	Erysipelothrix_phage_SE-1
YP_009201495	Lactobacillus_phage_iA2
YP_009797149	Faecalibacterium_phage_FP_Epona
YP_010098819	Gordonia_phage_Buggaboo
YP_009949671	Mycobacterium_phage_Saguaro
YP_009949123	Enterobacter_phage_EcpYZU01
YP_009778013	uncultured_phage_MedDCM-OCT-S45-C4
NP_599034	Enterobacteria_phage_SfV
NP_892047	Yersinia_phage_PY54
NP_700375	Salmonella_phage_ST64B
YP_005087496	Cyanophage_NATL1A-7
YP_009889552	Klebsiella_phage_Magnus
YP_007111578	Enterobacteria_phage_mEp235
YP_008772115	Salmonella_phage_Maynard
YP_009005927	Rhizobium_phage_vB_RglS_P106B
YP_009287481	Gordonia_phage_Bantam
YP_009603380	Arthrobacter_phage_CaptnMurica
YP_009788557	Pectobacterium_phage_PP81
YP_009817034	Arthrobacter_phage_Liebe
YP_009778074	uncultured_phage_MedDCM-OCT-S28-C3
YP_009103500	Synechococcus_phage_S-CBP3
YP_009615353	Streptomyces_phage_Scap1
YP_009797961	Pseudomonas_phage_Henninger
YP_009625579	Gordonia_phage_Sour
YP_009821647	Escherichia_phage_Lidtsur
NP_612831	Clostridium_phage_phi3626
YP_699944	Clostridium_phage_phiSM101
YP_009012597	Rhodococcus_phage_ReqiPoco6
YP_010083079	Leuconostoc_phage_phiMH1
YP_009596669	Streptomyces_phage_Rima
YP_009797593	Faecalibacterium_phage_FP_oengus
YP_010064515	Pseudomonas_phage_vB_PsyP_3MF5
YP_009785761	Lactobacillus_phage_SA-C12
YP_009276143	Gordonia_phage_Bachita
YP_009815204	Arthrobacter_phage_Bridgette
YP_010064531	Ralstonia_phage_Anchaing
YP_001686870	Azospirillum_phage_Cd
YP_009009849	Mycobacterium_phage_40AC
YP_009219630	Staphylococcus_phage_IME-SA4
YP_009948666	Pseudomonas_phage_17A
YP_009596416	Rhodococcus_phage_Weasels2
YP_009799125	Yersinia_phage_fPS-59
YP_009804595	Escherichia_phage_SRT7
YP_009014503	Mycobacterium_phage_Blue7
YP_008767076	Mycobacterium_phage_Fredward
YP_008853725	Staphylococcus_phage_phiRS7
YP_009005756	Mycobacterium_phage_EagleEye
YP_009593480	Paracoccus_phage_Shpa
YP_009603097	Arthrobacter_phage_Circum
YP_009800974	Dickeya_phage_Dagda
YP_009801153	Dickeya_phage_Ninurta
YP_009949862	Mycobacterium_phage_CRB2
YP_009949764	Mycobacterium_phage_Quesadilla
YP_009901466	Hanrivervirus_hv2019SD1
YP_002003836	Klebsiella_phage_K11
YP_009018419	Mycobacterium_phage_Stinger
YP_007236656	Staphylococcus_phage_StB20
YP_009200548	Staphylococcus_phage_StB20-like
YP_009187313	Yersinia_phage_vB_YenP_AP10
YP_010104321	Mycobacterium_phage_Jeeves
YP_010107285	Agrobacterium_phage_OLIVR5
YP_009777629	uncultured_phage_MedDCM-OCT-S37-C6
YP_007005472	Erwinia_phage_vB_EamP-L1
YP_008409641	Mycobacterium_phage_KayaCho
YP_009004210	Citrobacter_phage_CR8
YP_009126454	Lactobacillus_phage_Ldl1
YP_009204322	Escherichia_phage_P694
YP_009196384	Enterobacter_phage_phiEap-1
YP_009291577	Morganella_phage_vB_MmoP_MP2
YP_009816461	Synechococcus_phage_S-CBWM1
YP_009801107	Pectobacterium_phage_Jarilo
YP_007238033	Erwinia_phage_ENT90
YP_008409927	Mycobacterium_phage_Reprobate
YP_009205387	Mycobacterium_phage_Larenn
YP_009303562	Mycobacterium_phage_Mulciber
YP_009882676	Klebsiella_phage_ST13-OXA48phi12.1
YP_009777906	uncultured_phage_MedDCM-OCT-S31-C1
YP_001718747	P2_gpP-like_protein_Felsduovirus_Fels2
YP_004306409	Burkholderia_phage_KS5
YP_009193461	Mycobacterium_phage_Baee
YP_009604040	Arthrobacter_phage_Tank
YP_004539123	Pantoea_phage_LIMEzero
YP_009324988	Escherichia_phage_GA2A
YP_009811764	Curvibacter_phage_P26059B
YP_009949352	Mycobacterium_phage_Thonko
YP_009882565	Klebsiella_phage_ST147-VIM1phi7.1
NP_839851	Peduovirus_L413C
YP_009103815	Synechococcus_phage_S-CBP4
YP_004957638	Nocardia_phage_NBR1
YP_007379086	Halovirus_HSTV-2
YP_009152457	Escherichia_phage_CICC_80001
YP_009200919	Enterococcus_phage_IME-EFm5
YP_009790740	DNA_maturation_protein_Pasteurella_phage_vB_PmuP_PHB02
YP_009615135	Rhodococcus_phage_Trina
YP_009795206	Pectobacterium_phage_DU_PP_II
YP_009799022	Pseudomonas_phage_phiNV3
YP_009883291	Salmonella_phage_SW9
YP_009949467	Mycobacterium_phage_BirdsNest
YP_009042651	Enterococcus_phage_IME-EFm1
YP_009275664	Pseudomonas_phage_phi2
YP_009830078	Bacillus_phage_vB_BceS-MY192
YP_009797323	Faecalibacterium_phage_FP_Mushu
YP_009777923	uncultured_phage_MedDCM-OCT-S38-C3
NP_076613	Lactococcus_phage_bIL285
YP_009018516	Mycobacterium_phage_Akoma
YP_008857945	Mycobacterium_phage_Conspiracy
YP_009830311	Nodularia_phage_vB_NpeS-2AV2
YP_009304669	Mycobacterium_phage_Bactobuster
YP_001165255	Aresaunavirus_RSA1
YP_008858920	Xylella_phage_Paz
YP_009224013	Achromobacter_phage_JWF
YP_008409307	Mycobacterium_phage_Adzzy
YP_010082347	Paenibacillus_phage_Scottie
YP_010061619	Mycobacterium_phage_DarthPhader
YP_009796552	Pseudomonas_phage_PMBT3
YP_009801943	Microbacterium_phage_Hendrix
NP_943780	Mycobacterium_phage_PG1
YP_010061538	Mycobacterium_phage_Pharaoh
YP_009820332	Pseudomonas_phage_Lana
YP_009949570	Mycobacterium_phage_LilMcDreamy
YP_009014878	Mycobacterium_phage_Alma
YP_007677420	Mycobacterium_phage_First
YP_008859432	Xylella_phage_Prado
YP_009788862	Ralstonia_phage_RS-PII-1
YP_006907293	Bacillus_phage_Bastille
YP_008318309	Bacillus_phage_phiNIT1
YP_009031337	Bacillus_phage_Bcp1
YP_009783600	Bacillus_phage_B5S
YP_009151157	Bacillus_phage_Mater
YP_004957018	Bacillus_phage_W.Ph.
YP_006907847	Bacillus_phage_BCP78
YP_006907565	Bacillus_phage_BPS13
YP_009227058	Bacillus_phage_Bp8p-C
YP_009274744	Bacillus_phage_Eldridge
YP_009784261	Burkholderia_phage_Bp-AMP1
YP_009275269	Bacillus_phage_Shbh1
NP_877482	Pseudomonas_phage_phiKMV
YP_293751	Burkholderia_phage_phiE52237
YP_009785954	Xanthomonas_phage_XAJ24
YP_654730	Pasteurella_phage_F108
NP_076734	Lactococcus_phage_bIL309
YP_004306879	Burkholderia_phage_KS14
YP_009600926	Staphylococcus_phage_phiIBB-SEP1
YP_009843683	Pantoea_phage_vB_PagM_LIET2
YP_009224496	Staphylococcus_phage_812
YP_001650887	Vibrio_virus_Kappa
YP_007878111	Vibrio_phage_henriette_12B8
YP_009889805	Acinetobacter_phage_AM101
YP_009811863	Pectobacterium_phage_Gaspode
YP_009225825	Streptomyces_phage_Jay2Jay
YP_009607406	Klebsiella_phage_Miro
YP_009839537	Streptomyces_phage_StarPlatinum
NP_043485	Hpunavirus_HP1
YP_009616199	Listeria_phage_LMTA-34
YP_010097177	Escherichia_virus_KFS-EC
YP_009798044	Lactobacillus_phage_Bacchae
YP_009097815	Citrobacter_phage_Miller
YP_004306453	Burkholderia_phage_KL3
YP_009218311	Enterococcus_phage_EFDG1
YP_009949952	Mycobacterium_phage_Imvubu
YP_009217563	Stenotrophomonas_phage_IME13
YP_009207755	Mannheimia_phage_vB_MhM_587AP1
YP_009008362	Stenotrophomonas_phage_Smp131
YP_009222295	Lactobacillus_phage_LfeInf
YP_009821330	Shigella_phage_Buco
YP_009873697	Tenacibaculum_phage_PTm1
YP_009797490	Faecalibacterium_phage_FP_Toutatis
YP_009167701	(endogenous_virus)_Enterobacter_phage_phiKDA1
YP_009043879	Vibrio_phage_X29
YP_009788797	Pectobacterium_phage_PP99
YP_003347645	Klebsiella_phage_KP34
YP_009202208	Bacteriophage_Lily
YP_008058699	Halovirus_HHTV-1
YP_009817551	Vibrio_phage_1.204.O._10N.222.46.F12
YP_009876743	Tenacibaculum_phage_pT24
NP_049926	Streptococcus_phage_Sfi19
NP_050148	Lactobacillus_phage_phiadh
YP_009220154	Streptococcus_phage_APCM01
YP_009797652	Erwinia_phage_vB_EamP-S2
NP_038323	Streptococcus_phage_7201
NP_758915	Vibrio_phage_VHML
YP_358760	Lactobacillus_phage_Lc-Nu
YP_009829511	Lactobacillus_phage_T25
YP_009844247	Lactobacillus_phage_SAC12B
YP_654141	Vectrevirus_K15
YP_007003554	Lactobacillus_phage_Sha1
YP_010133135	Escherichia_phage_UAB_Phi78
YP_009209235	Proteus_phage_vB_PmiP_Pm5460
YP_002455791	Lactobacillus_phage_Lv-1
YP_001429607	Bacillus_phage_0305phi8-36
YP_009799372	Salmonella_phage_vB_SpuP_Spp16
YP_007947927	Enterobacteria_phage_phi80
YP_002321454	Stenotrophomonas_phage_S1
YP_009797193	Faecalibacterium_phage_FP_Lagaffe
YP_009909423	Escherichia_virus_Lambda_4A7
NP_839922	Lactococcus_phage_P335
YP_009006540	Acinetobacter_phage_Petty
YP_001686738	Halomonas_phage_phiHAP-1
YP_009289232	Pseudomonas_phage_MD8
YP_007676020	Vibrio_phage_PWH3a-P1
YP_009797394	Faecalibacterium_phage_FP_Taranis
YP_009948778	Vibrio_phage_PV94
YP_001293346	Pseudomonas_phage_F10
YP_006561151	Burkholderia_phage_vB_BceS_AH2
NP_076675	Lactococcus_phage_bIL286
YP_009146939	Aurantimonas_phage_AmM-1
YP_009835993	Streptomyces_phage_WRightOn
YP_009838058	Streptomyces_phage_FlowerPower
YP_009099565	Rhizobium_phage_vB_RleM_PPF1
YP_010037966	Burkholderia_phage_Mica
YP_009103717	Shewanella_sp._phage_1/44
YP_007004712	Erwinia_phage_vB_EamM-Y2
YP_009021814	Pectobacterium_phage_PM1
YP_009802140	Erwinia_phage_Faunus
YP_009850524	Escherichia_phage_Mangalitsa
YP_009884110	Escherichia_phage_vB_EcoM_4HA13
NP_918997	TerL_Burkholderia_phage_BcepNazgul
YP_009284266	Enterobacter_phage_Arya
YP_010000103	Pseudomonas_phage_vB_Pae-SS2019XI
YP_010037902	Achromobacter_phage_Mano
YP_010038035	Pseudomonas_phage_Persinger
YP_009100020	Escherichia_phage_vB_EcoM-ep3
YP_010087471	Phascolarctid_gammaherpesvirus_1
YP_009620170	Corynebacterium_phage_C3PO
YP_009997882	Proteus_phage_Saba
YP_010087398	Vombatid_gammaherpesvirus_1
YP_009998560	Cronobacter_phage_JC01
YP_006906015	Providencia_phage_Redjac
YP_009786599	Escherichia_phage_ESCO13
YP_009834129	Klebsiella_phage_KPN_N137
YP_009998009	Proteus_phage_PM87
YP_007007010	Enterobacter_phage_Enc34
YP_009999781	Salmonella_phage_SAP012
YP_010278145	Enterobacter_phage_KNP7
YP_009099718	Ruegeria_phage_DSS3-P1
YP_009984479	Escherichia_phage_vB_EcoM_PHB05
YP_007674918	Loktanella_phage_pCB2051-A
YP_009639195	Xylella_phage_Salvo
YP_001272515	Enterobacteria_phage_cdtI
YP_009998232	Aeromonas_phage_vB_AhyS-A18P4
YP_007111505	Enterobacteria_phage_mEp043_c-1
YP_007112076	Enterobacteria_phage_mEp460
YP_009998307	Aeromonas_phage_LAh_7
YP_009997535	Achromobacter_phage_vB_AchrS_AchV4
YP_009213469	Rhodobacter_phage_RcRhea
YP_010000197	Pectobacterium_phage_MA11
YP_009639123	Xylella_phage_Sano
YP_009997771	Bacteriophage_Phobos
YP_009997093	Synechococcus_virus_S-ESS1
YP_009140180	Salmonella_phage_Det7
YP_009889353	Salmonella_phage_P46FS4
YP_009796392	Klebsiella_phage_Menlow
YP_009854229	Vibrio_phage_vB_VchM_Kuja
YP_010359616	CrAss-like_virus_sp.
YP_010359431	CrAss-like_virus_sp.
YP_010097895	Gordonia_phage_Angelicage
YP_009301926	Gordonia_phage_Vivi2
YP_009216852	Clostridium_phage_phiCDHM19
YP_009614610	Aeromonas_phage_pIS4-A
YP_009604392	Mycobacterium_phage_Athena
YP_009636920	Mycobacterium_phage_LittleE
YP_008126830	Vibrio_phage_JA-1
YP_010002479	Gordonia_phage_Ali17
YP_010002840	Gordonia_phage_Verity
YP_009208417	Mycobacterium_phage_Toto
YP_009976587	Mycobacterium_phage_Anglerfish
YP_009012698	Mycobacterium_phage_Violet
YP_006989713	Caulobacter_virus_Karma
YP_006989360	Caulobacter_phage_CcrRogue
YP_010110045	Gordonia_phage_Clown
